# Supplementary material
Source: PubMed Central journal article supplement (PMC11528615)
Supplement: sj-pdf-1-hth-10.1177_17589983241268069.pdf [file sj-pdf-1-hth-10.1177_17589983241268069.pdf]

Supplementary Material 1. Quality appraisal of reviewed papers. (Green = favourable response, Am

| Study Author           | Study Design                     | CASP hecklist used | Q1         | Q2         | Q3         |
|------------------------|----------------------------------|--------------------|------------|------------|------------|
| Ayhan et al. 2021      | Prospective cohort study         | Cohort study       | Can't tell | Yes        | Yes        |
| Grubhofer et al. 2019  | Prospective observational study. | Case Control Study | Yes        | Yes        | Yes        |
| Kaskutas, Powell. 2013 | Qualitative                      | Qualitative        | Yes        | Yes        | Yes        |
| Mercurio et al.2023    | Prospective cohort study         | Cohort study       | Yes        | Yes        | yes        |
| Mottay 2020            | Mixed methods                    | Qualitative        | Yes        | Yes        | Yes        |
| O'Brien. 2010          | Qualitative                      | Qualitative        | Yes        | Yes        | Yes        |
| Roh et al. 2016        | Prospective cohort study         | Cohort study       | Yes        | Can't tell | Yes        |
| Savas et al.2022       | Prospective cohort study         | Cohort study       | Yes        | Yes        | Yes        |
| Silverio, Cheung. 2014 | Prospective cohort study         | Cohort study       | Yes        | Can't tell | Can't tell |
| Mortazavi et al.       | Prospective cohort study         | Cohort study       | Yes        | Yes        | Yes        |
| Weir et al.            | Prospective cohort               | Cohort study       | Yes        | Can't tell | Yes        |
| Cole et al.            | Qualitative                      | Qualitative        | Yes        | Yes        | Yes        |
| Azad et al.            | Prospective cohort study         | Cohort study       | Yes        | Can't tell | Yes        |

(Green = neutral response, Red = non-favourable response)

| Q4         | Q5/ Q5a    | Q5b        | Q6/Q6a     | Q6b        | Q7                                                                                                                                                                                                                                                                                                                                                                                                                                                                           |
|------------|------------|------------|------------|------------|------------------------------------------------------------------------------------------------------------------------------------------------------------------------------------------------------------------------------------------------------------------------------------------------------------------------------------------------------------------------------------------------------------------------------------------------------------------------------|
| No         | No         | No         | No         | Can't tell | Mean extension lag of 12.4 degrees. However, they appear to have excluded semi-compliant patients thereby significantly affecting the ability to interpret these results.                                                                                                                                                                                                                                                                                                    |
| Can't Tell | Yes        | NA         | Can't Tell | Can't Tell | Can't tell                                                                                                                                                                                                                                                                                                                                                                                                                                                                   |
| Yes        | Yes        | NA         | Yes        | NA         | Yes                                                                                                                                                                                                                                                                                                                                                                                                                                                                          |
| yes        | No         | No         | No         | Yes        | Direct correlation between the female sex and adherence to the brace, direct correlation between adherence to the brace and the number of weeks it was worn according to the medical recommendation. A correlation between lower educational qualifications and poorer outcomes. No correlation emerged between adherence to the brace and functional results. According to the regression analysis, diabetes was found to be a predictor of worse postoperative DASH scores |
| Yes        | Yes        | NA         | Can't tell | NA         | Yes                                                                                                                                                                                                                                                                                                                                                                                                                                                                          |
| Yes        | Yes        | NA         | No         | NA         | Can't tell                                                                                                                                                                                                                                                                                                                                                                                                                                                                   |
| Yes        | No         | No         | Can't tell | Can't Tell | Predictors of extensor lag following treatment of a mallet injury include age, adherence and health literacy.                                                                                                                                                                                                                                                                                                                                                                |
| No         | Yes        | Can't tell | Can't tell | Yes        | Adherence is affected by many factors<br>Depression can be a barrier to post op splint adherence<br>Only 1/3 of patients were fully adherent to orthosis wear despite advice                                                                                                                                                                                                                                                                                                 |
| No         | Can't tell | No         | Yes        | No         | No impact of adherence on functional outcome, smokers more likely to be adherent                                                                                                                                                                                                                                                                                                                                                                                             |
| Yes        | Yes        | No         | Yes        | Yes        | Longer cast immobilisation time at the start and fear of movement are important factors that may negatively affect early outcomes after a proximal phalangeal fracture                                                                                                                                                                                                                                                                                                       |
| Yes        | Yes        | Yes        | No         | Yes        | Significant difference in patient reported adherence than temperatur sensor reported adherence (patients reported higher!). Factors identified included BMI and sex.                                                                                                                                                                                                                                                                                                         |
| Yes        | Yes        | NA         | Can't tell | NA         | Yes                                                                                                                                                                                                                                                                                                                                                                                                                                                                          |
| Yes        | Yes        | Yes        | No         | No         | Strong association between success of splint treatment and younger patients and compliance with treatment. most patients did not report any functional limitations. time to treat and baseline extensor lag didn't affect treatment success.                                                                                                                                                                                                                                 |

| Q8                                                                                                                                                                                                   | Q9                                                                                                                                         | Q10                          | Q11 |
|------------------------------------------------------------------------------------------------------------------------------------------------------------------------------------------------------|--------------------------------------------------------------------------------------------------------------------------------------------|------------------------------|-----|
| Poorly precise due to the exclusion of participants. Confidence intervals not expressed. They also did not include the results for PIPJ range of motion, despite this being one of their objectives. | Can't tell                                                                                                                                 | No                           | Yes |
| Can't tell                                                                                                                                                                                           | Yes                                                                                                                                        | Yes                          | Yes |
| No                                                                                                                                                                                                   | Yes                                                                                                                                        | Adds to the literature base. | NA  |
| Can't tell                                                                                                                                                                                           | No                                                                                                                                         | Can't tell                   | Yes |
| Can't tell                                                                                                                                                                                           | Yes                                                                                                                                        | Adds to the literature base. | NA  |
| Yes                                                                                                                                                                                                  | Yes                                                                                                                                        | Adds to the literature base. | NA  |
| They appear appropriately precise and data is expressed with confidence intervals.                                                                                                                   | Despite some confounding factors being missing (especially occupation and comorbidities), broadly believe that their assertion is correct. | Yes                          | Yes |
| Good precision                                                                                                                                                                                       | Yes                                                                                                                                        | Yes                          | Yes |
| Limited precision. Did not give confidence intervals, only standard deviation.                                                                                                                       | Can't tell                                                                                                                                 | Can't tell                   | No  |
| Good precision                                                                                                                                                                                       | Yes                                                                                                                                        | Yes                          | Yes |
| Good precision                                                                                                                                                                                       | Yes                                                                                                                                        | Can't tell                   | Yes |
| Yes                                                                                                                                                                                                  | Yes                                                                                                                                        | Some Value                   | NA  |
| Not Precise                                                                                                                                                                                          | Yes                                                                                                                                        | Yes                          | Yes |

| Q12        |
|------------|
| Can't tell |
| NA         |
| NA         |
| Can't tell |
| NA         |
| NA         |
| Yes        |
| Yes        |
| Can't tell |
| Yes        |
| Yes        |
| NA         |
| Yes        |
